# Supplementary material
Source: HighWire-hosted journal article supplement (http://www.ajnr.org/highwire/filestream/60655/field_highwire_adjunct_files/0/17-01269.pdf)
Supplement: 17-01269.pdf [file 17-01269.pdf]

**On-line Table 1: Clinical-radiologic data of the 38 patients included in the study<sup>a</sup>**

| Patient No. | Sex | Age at Clinical Onset (yr) | Symptoms                         | Side  | Suzuki Classification | Surgical Procedure | Age Time Point 1 (yr) | Age Time Point 2 (yr) | Interval between Time Points (mo) | Postoperative Outcome | MRA Outcome             |
|-------------|-----|----------------------------|----------------------------------|-------|-----------------------|--------------------|-----------------------|-----------------------|-----------------------------------|-----------------------|-------------------------|
| 1           | M   | 1                          | Right hemiparesis                | Left  | III                   | EDAMS              | 1                     | 5                     | 53                                | Excellent             | ↓ Deep CV and ↑ Pial CV |
|             |     |                            |                                  | Right | II                    | EDAMS              | 1                     | 5                     | 47                                |                       | ↓ Deep CV and ↑ Pial CV |
| 2           | F   | 2                          | Aphasia, hypotonia               | Left  | III                   | EDAMS              | 2                     | 4                     | 15                                | Fair                  | ↑ Pial CV               |
| 3           | F   | 4                          | Central retinal artery occlusion | Left  | III                   | EDAMS              | 4                     | 8                     | 36                                | Excellent             | ↑ Pial CV               |
|             |     |                            |                                  | Right | III                   | EDAMS              | 4                     | 8                     | 43                                |                       | ↓ Deep CV               |
| 4           | F   | 13                         | Right hemiparesis                | Left  | II                    | EDAMS              | 13                    | 17                    | 35                                | Excellent             | ↓ Deep CV and ↑ Pial CV |
|             |     |                            |                                  | Right | III                   | EDAMS              | 13                    | 17                    | 50                                |                       | ↓ Deep CV and ↑ Pial CV |
| 5           | M   | 11                         | TIA, right facial nerve deficit  | Left  | IV                    | EDAMS              | 11                    | 14                    | 38                                | Good                  | ↑ Pial CV               |
|             |     |                            |                                  | Right | III                   | EDAMS              | 11                    | 14                    | 41                                |                       | ↑ Pial CV               |
| 6           | M   | 6                          | TIA                              | Right | III                   | EDAMS              | 6                     | 7                     | 12                                | Fair                  | Unchanged               |
| 7           | M   | 1                          | Seizure                          | Left  | III                   | EDAMS              | 1                     | 3                     | 22                                | Good                  | ↑ Pial CV               |
|             |     |                            |                                  | Right | II                    | EDAMS              | 1                     | 3                     | 27                                |                       | ↓ Deep CV and ↑ Pial CV |
| 8           | M   | 5                          | TIA, headache                    | Left  | III                   | EDAMS              | 5                     | 6                     | 11                                | Fair                  | ↓ Deep CV               |
| 9           | F   | 7                          | Headache                         | Left  | III                   | EDAMS              | 7                     | 10                    | 36                                | Good                  | ↓ Deep CV and ↑ Pial CV |
| 10          | F   | 13                         | Right hemiparesis                | Left  | III                   | EDAMS              | 13                    | 18                    | 52                                | Excellent             | ↓ Deep CV and ↑ Pial CV |
|             |     |                            |                                  | Right | III                   | EDAMS              | 13                    | 18                    | 48                                |                       | ↓ Deep CV and ↑ Pial CV |
| 11          | F   | 8                          | TIA                              | Right | IV                    | EDAMS              | 8                     | 9                     | 11                                | Fair                  | ↓ Deep CV               |
| 12          | F   | 1                          | Seizure                          | Right | III                   | EDAMS              | 1                     | 6                     | 62                                | Excellent             | ↓ Deep CV and ↑ Pial CV |
|             |     |                            |                                  | Left  | III                   | EDAMS              | 1                     | 6                     | 58                                |                       | ↓ Deep CV and ↑ Pial CV |
| 13          | F   | 1                          | Seizure                          | Right | IV                    | EDAMS              | 1                     | 2                     | 5                                 | Fair                  | Unchanged               |
| 14          | M   | 1                          | Headache                         | Left  | III                   | EDAMS              | 1                     | 2                     | 5                                 | Excellent             | ↓ Deep CV               |
| 15          | F   | 2                          | Seizure                          | Right | II                    | EDAMS              | 1                     | 2                     | 5                                 | Excellent             | ↑ Pial CV               |
| 16          | M   | 13                         | Right hemiparesis                | Right | III                   | EDAMS              | 13                    | 18                    | 64                                | Excellent             | ↓ Deep CV and ↑ Pial CV |
|             |     |                            |                                  | Left  | III                   | EDAMS              | 13                    | 18                    | 57                                |                       | ↓ Deep CV and ↑ Pial CV |
| 17          | F   | 1                          | TIA                              | Left  | IV                    | EDAMS              | 1                     | 4                     | 36                                | Excellent             | ↓ Deep CV and ↑ Pial CV |
| 18          | F   | 1                          | Headache                         | Left  | II                    | EDAMS              | 1                     | 2                     | 14                                | Excellent             | ↓ Deep CV and ↑ Pial CV |
| 19          | M   | 1                          | Headache                         | Left  | III                   | EDAMS              | 1                     | 3                     | 30                                | Fair                  | ↓ Deep CV               |
| 20          | F   | 11                         | TIA/seizure                      | Left  | IV                    | EDAMS              | 11                    | 16                    | 56                                | Good                  | ↑ Pial CV               |
| 21          | F   | 12                         | Headache                         | Right | III                   | EDAMS              | 12                    | 15                    | 43                                | Good                  | ↓ Deep CV               |
|             |     |                            |                                  | Left  | III                   | EDAMS              | 12                    | 15                    | 40                                |                       | ↑ Pial CV               |
| 22          | M   | 1                          | Headache                         | Left  | II                    | EDAMS              | 1                     | 2                     | 11                                | Excellent             | ↓ Deep CV and ↑ Pial CV |
| 23          | F   | 12                         | Left hemiparesis                 | Left  | IV                    | EDAMS              | 12                    | 15                    | 42                                | Excellent             | ↓ Deep CV and ↑ Pial CV |
| 24          | F   | 6                          | TIA, headache                    | Left  | II                    | EDAMS              | 6                     | 8                     | 18                                | Good                  | ↑ Pial CV               |
| 25          | M   | 1                          | Quadriplegia                     | Right | II                    | EDAMS              | 1                     | 4                     | 33                                | Good                  | ↓ Deep CV and ↑ Pial CV |
|             |     |                            |                                  | Left  | II                    | EDAMS              | 1                     | 4                     | 33                                |                       | ↑ Pial CV               |
| 26          | M   | 1                          | TIA                              | Left  | III                   | EDAMS              | 1                     | 1                     | 5                                 | Fair                  | Unchanged               |
| 27          | F   | 1                          | TIA                              | Left  | III                   | EDAMS              | 1                     | 2                     | 11                                | Excellent             | ↓ Deep CV and ↑ Pial CV |
| 28          | F   | 1                          | Headache                         | Right | III                   | EDAMS              | 1                     | 1                     | 5                                 | Excellent             | ↓ Deep CV               |
| 29          | M   | 10                         | Mild headache                    | Right | II                    | –                  | 10                    | 14                    | 52                                | –                     | ↑ Deep CV               |
|             |     |                            |                                  | Left  | II                    | –                  | 10                    | 14                    | 52                                |                       | Unchanged               |
| 30          | F   | 13                         | Drug-responsive seizure          | Right | II                    | –                  | 13                    | 17                    | 41                                | –                     | Unchanged               |
|             |     |                            |                                  | Left  | II                    | –                  | 13                    | 17                    | 41                                |                       | ↑ Deep CV               |
| 31          | F   | 5                          | Mild headache                    | Right | III                   | –                  | 5                     | 8                     | 35                                | –                     | Unchanged               |
|             |     |                            |                                  | Left  | II                    | –                  | 5                     | 8                     | 35                                |                       | Unchanged               |
| 32          | F   | 2                          | Drug-responsive seizure          | Right | III                   | –                  | 2                     | 3                     | 12                                | –                     | Unchanged               |
|             |     |                            |                                  | Left  | III                   | –                  | 2                     | 3                     | 12                                |                       | Unchanged               |
| 33          | M   | 14                         | Drug-responsive seizure          | Right | II                    | –                  | 14                    | 15                    | 15                                | –                     | ↑ Deep CV               |
|             |     |                            |                                  | Left  | I                     | –                  | 14                    | 15                    | 15                                |                       | ↑ Deep CV               |
| 34          | F   | 3                          | Mild headache                    | Right | I                     | –                  | 3                     | 6                     | 36                                | –                     | Unchanged               |
|             |     |                            |                                  | Left  | II                    | –                  | 3                     | 6                     | 36                                |                       | Unchanged               |
| 35          | F   | 1                          | Mild headache                    | Right | II                    | –                  | 1                     | 5                     | 52                                | –                     | Unchanged               |
|             |     |                            |                                  | Left  | I                     | –                  | 1                     | 5                     | 52                                |                       | Unchanged               |
| 36          | M   | 3                          | Mild headache                    | Right | II                    | –                  | 3                     | 7                     | 41                                | –                     | ↑ Deep CV               |
|             |     |                            |                                  | Left  | I                     | –                  | 3                     | 7                     | 41                                |                       | Unchanged               |
| 37          | M   | 8                          | Mild headache                    | Right | II                    | –                  | 8                     | 11                    | 35                                | –                     | ↑ Deep CV               |
|             |     |                            |                                  | Left  | II                    | –                  | 8                     | 11                    | 35                                |                       | ↑ Deep CV               |
| 38          | F   | 10                         | Mild headache                    | Right | II                    | –                  | 10                    | 11                    | 12                                | –                     | Unchanged               |
|             |     |                            |                                  | Left  | I                     | –                  | 10                    | 11                    | 12                                |                       | Unchanged               |

**Note:**—CV indicates collateral vessels; –, not operated; ↑, increased; ↓, decreased.

<sup>a</sup>The Moyamoya vasculopathy is classified, according to the Suzuki classification, into 6 stages based on the findings of conventional angiography: I, stenosis of the intracranial bifurcation of the internal carotid artery; II, first appearance of Moyamoya vessels (dilation of the intracerebral arteries); III, increase of Moyamoya vessels (disappearance of the middle cerebral and anterior cerebral arteries); IV, minimization of Moyamoya vessels (disappearance of the middle cerebral and anterior cerebral arteries); V, shrinking of Moyamoya vessels (disappearance of the intracerebral arteries); and VI, disappearance of Moyamoya vessels and dominance of collateral circulation from only the external carotid system.

**On-line Table 2: Comparison of DSC CBF-related parameters at first MRI and at last follow-up between surgical and nonsurgical brain hemispheres**

| Index                    | Surgical             | Nonsurgical   | P <sup>a</sup> |               |                    |
|--------------------------|----------------------|---------------|----------------|---------------|--------------------|
| Central nCBF (mean)      | Before the operation | 1.806 ± 1.001 | First MRI      | 1.820 ± 0.916 | .969               |
|                          | Last follow-up       | 1.107 ± 0.835 | Last follow-up | 1.856 ± 0.863 | .005 <sup>b</sup>  |
| % Variance central nCBF  |                      | -33.8%        |                | 10%           | <.001 <sup>b</sup> |
| Cortical nCBF (mean)     | Before the operation | 1.224 ± 0.693 | First MRI      | 1.328 ± 0.663 | .772               |
|                          | Last follow-up       | 2.811 ± 2.298 | Last follow-up | 1.363 ± 0.612 | .011 <sup>b</sup>  |
| % Variance cortical nCBF |                      | 152.1%        |                | 12.1%         | .001 <sup>b</sup>  |
| Mean nCBF                | Before the operation | 1.515 ± 0.814 | First MRI      | 1.574 ± 0.777 | .921               |
|                          | Last follow-up       | 1.959 ± 1.474 | Last follow-up | 1.610 ± 0.725 | .334               |
| % Variance mean nCBF     |                      | 47.4%         |                | 11%           | .121               |
| hdSD (mean)              | Before the operation | 1.515 ± 0.364 | First MRI      | 1.359 ± 0.233 | .173               |
|                          | Last follow-up       | 0.454 ± 0.239 | Last follow-up | 1.342 ± 0.241 | <.001 <sup>b</sup> |
| % Variance hdSD          |                      | -68.8%        |                | -1.2%         | <.001 <sup>b</sup> |

<sup>a</sup> Significance level of 1-way analysis of covariance used to compare CBF-related parameters in surgical and nonsurgical brain hemispheres.

<sup>b</sup> Significant.

**On-line Table 3: Pairwise post hoc comparisons of CBF-related parameters that were different for clinical outcome categories**

| Perfusion Index                    | (I) Clinical Category | (J) Clinical Category | Mean Difference |        | P <sup>a</sup>     | 95% Confidence Interval |             |
|------------------------------------|-----------------------|-----------------------|-----------------|--------|--------------------|-------------------------|-------------|
|                                    |                       |                       | (I - J)         | SD     |                    | Lower Limit             | Upper Limit |
| DSC hdSD TP2                       | Fair                  | Good                  | 0.191           | 0.129  | .380               | -0.133                  | 0.514       |
|                                    |                       | Excellent             | 0.361           | 0.119  | .014 <sup>b</sup>  | 0.062                   | 0.661       |
|                                    | Good                  | Fair                  | -0.191          | 0.129  | .380               | -0.514                  | 0.133       |
|                                    |                       | Excellent             | 0.171           | 0.099  | .255               | -0.078                  | 0.419       |
|                                    | Excellent             | Fair                  | -0.0361         | 0.119  | .014 <sup>b</sup>  | -0.661                  | -0.062      |
|                                    |                       | Good                  | -0.171          | 0.099  | .255               | -0.419                  | 0.078       |
| DSC hdSD TP3                       | Fair                  | Good                  | 0.22            | 0.074  | .017 <sup>b</sup>  | 0.032                   | 0.407       |
|                                    |                       | Excellent             | 0.455           | 0.069  | <.001 <sup>b</sup> | 0.282                   | 0.629       |
|                                    | Good                  | Fair                  | -0.22           | 0.074  | .017 <sup>b</sup>  | -0.407                  | -0.032      |
|                                    |                       | Excellent             | 0.236           | 0.057  | .001 <sup>b</sup>  | 0.092                   | 0.379       |
|                                    | Excellent             | Fair                  | -0.455          | 0.069  | <.001 <sup>b</sup> | -0.629                  | -0.282      |
|                                    |                       | Good                  | -0.236          | 0.057  | .001 <sup>b</sup>  | -0.379                  | -0.092      |
| Early DSC % variance hdSD          | Fair                  | Good                  | 18.766          | 7.026  | .035 <sup>b</sup>  | 1.096                   | 36.436      |
|                                    |                       | Excellent             | 27.578          | 6.513  | .001 <sup>b</sup>  | 11.196                  | 43.959      |
|                                    | Good                  | Fair                  | -18.766         | 7.026  | .035 <sup>b</sup>  | -36.436                 | -1.096      |
|                                    |                       | Excellent             | 8.812           | 5.398  | .300               | -4.764                  | 22.388      |
|                                    | Excellent             | Fair                  | -27.578         | 6.513  | .001 <sup>b</sup>  | -43.959                 | -11.196     |
|                                    |                       | Good                  | -8.812          | 5.398  | .300               | -22.388                 | 4.764       |
| Late DSC % variance hdSD           | Fair                  | Good                  | 19.552          | 3.677  | <.001 <sup>b</sup> | 10.303                  | 28.801      |
|                                    |                       | Excellent             | 33.275          | 3.409  | <.001 <sup>b</sup> | 24.7                    | 41.849      |
|                                    | Good                  | Fair                  | -19.552         | 3.677  | <.001 <sup>b</sup> | -28.801                 | -10.303     |
|                                    |                       | Excellent             | 13.723          | 2.825  | <.001 <sup>b</sup> | 6.616                   | 20.829      |
|                                    | Excellent             | Fair                  | -33.275         | 3.409  | <.001 <sup>b</sup> | -41.849                 | -24.7       |
|                                    |                       | Good                  | -13.723         | 2.825  | <.001 <sup>b</sup> | -20.829                 | -6.616      |
| Early DSC % variance cortical nCBF | Fair                  | Good                  | -42.236         | 44.024 | .718               | -152.959                | 68.487      |
|                                    |                       | Excellent             | -72.700         | 40.814 | .232               | -175.348                | 29.948      |
|                                    | Good                  | Fair                  | 42.236          | 44.024 | .718               | -68.487                 | 152.959     |
|                                    |                       | Excellent             | -30.464         | 33.825 | .755               | -115.537                | 54.608      |
|                                    | Excellent             | Fair                  | 72.700          | 40.814 | .232               | -29.948                 | 175.348     |
|                                    |                       | Good                  | 30.464          | 33.825 | .755               | -54.608                 | 115.537     |
| Late DSC % variance cortical nCBF  | Fair                  | Good                  | -76.792         | 80.044 | .718               | -278.107                | 124.523     |
|                                    |                       | Excellent             | -132.182        | 74.207 | .232               | -318.815                | 54.451      |
|                                    | Good                  | Fair                  | 76.792          | 80.044 | .718               | -124.523                | 278.107     |
|                                    |                       | Excellent             | -55.39          | 61.501 | .755               | -210.067                | 99.288      |
|                                    | Excellent             | Fair                  | 132.182         | 74.207 | .232               | -54.451                 | 318.815     |
|                                    |                       | Good                  | 55.39           | 61.501 | .755               | -99.288                 | 210.067     |

<sup>a</sup> Comparisons were made using a 1-way analysis of covariance, and the Sidak correction for multiple comparisons was applied.

<sup>b</sup> Significant.

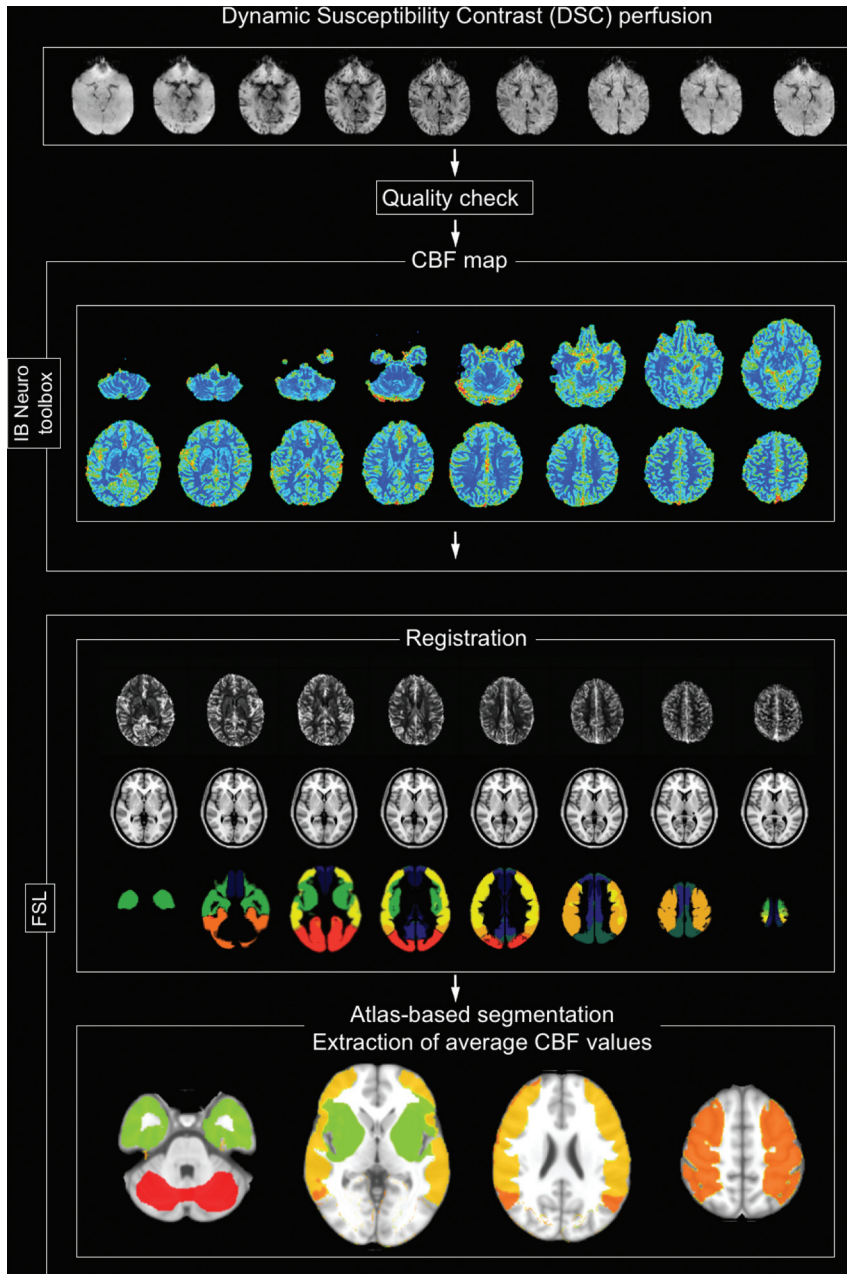

**ON-LINE FIG 1.** Flowchart of the pipeline used for DSC-PWI data analysis. The last row of images shows the automated determination of VOIs in the MCA territories overlaid on anatomic T1-weighted images. The average normalized CBF value determined from the green VOI corresponds to the central nCBF (proximal MCA territory). The average nCBF values determined from the yellow and orange VOIs correspond to the cortical nCBF (middle and distal MCA regions). The average CBF value determined from the red VOI at the cerebellar level is used for normalization.

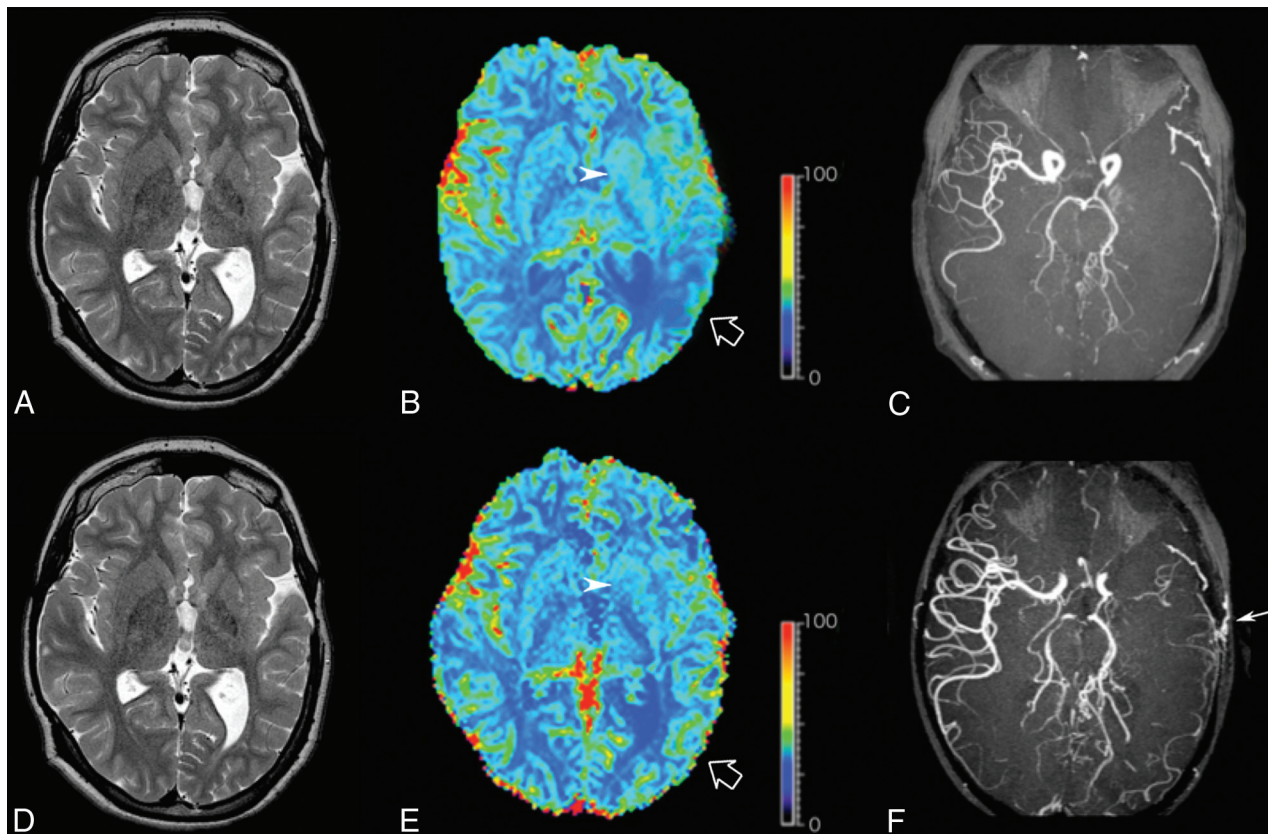

**ON-LINE FIG 2.** Representative T2-weighted images (A and D), DSC-CBF (B and E), and noncontrast MR angiography (C and F) of pre- (A–C) and postoperative (D–F) images in a 12-year-old patient with left Moyamoya disease treated with surgical indirect revascularization (EDAMS) (white arrow). The empty arrow indicates the left temporal region with reduced values of CBF before the operation (B). DSC-PWI acquired 42 months after left EDAMS shows improvement in CBF in the left temporal lobe (empty arrow, E). Arrowheads indicate preoperative hyperperfusion of the proximal MCA region (B), which returns to normal at postoperative PWI (E). The color scale unit of the CBF map is mL/100 mg/min.
